# Supplementary material for: Pleurotus abieticola Polysaccharide Alleviates Hyperlipidemia Symptoms via Inhibition of Nuclear Factor-κB/Signal Transducer and Activator of Transcription 3-Mediated Inflammatory Responses
Source: MDPI journal article supplement (doi:10.3390/nu15234904), 2023-11-23
Supplement: s1 [file s1]

# *Pleurotus abieticola* Polysaccharide Alleviates Hyper-lipidemia Symptoms via Inhibition of Nuclear Factor- $\kappa$ B/Signal Transducer and Activator of Transcription 3-Mediated Inflammatory Responses

Yongfeng Zhang<sup>1</sup>, Yingjie Lin<sup>1</sup>, Keyi Wu<sup>1</sup> Ming Jiang<sup>2</sup>, Lanzhou Li<sup>1\*</sup>, Yang Liu<sup>1\*</sup>

<sup>1</sup> *Engineering Research Center of Chinese Ministry of Education for Edible and Medicinal Fungi, Jilin Agricultural University, Changchun, 130118, China*

<sup>2</sup> *College of Life Science and Technology, Mudanjiang Normal University, Mudanjiang, 157011, China.*

\*Corresponding authors:

Yang Liu, Ph.D.

Engineering Research Center of Chinese Ministry of Education for Edible and Medicinal Fungi, Jilin Agricultural University,  
Changchun, Jilin, P.R.China.

Email: y\_liu10@jlau.edu.cn

Lanzhou Li, Ph.D.

Engineering Research Center of Chinese Ministry of Education for Edible and Medicinal Fungi, Jilin Agricultural University,  
Changchun, Jilin, P.R.China.

Email: lilanzhou@jlau.edu.cn

Yongfeng Zhang, Email: zhangyongfeng@jlau.edu.cn

Yingjie Lin, Email: linyingjie@uor.edu.cn

Keyi Wu, Email: wukeyi@mails.jlau.edu.cn

Ming Jiang, Email: jiangming@mdjnu.edu.cn

## Supplementary data

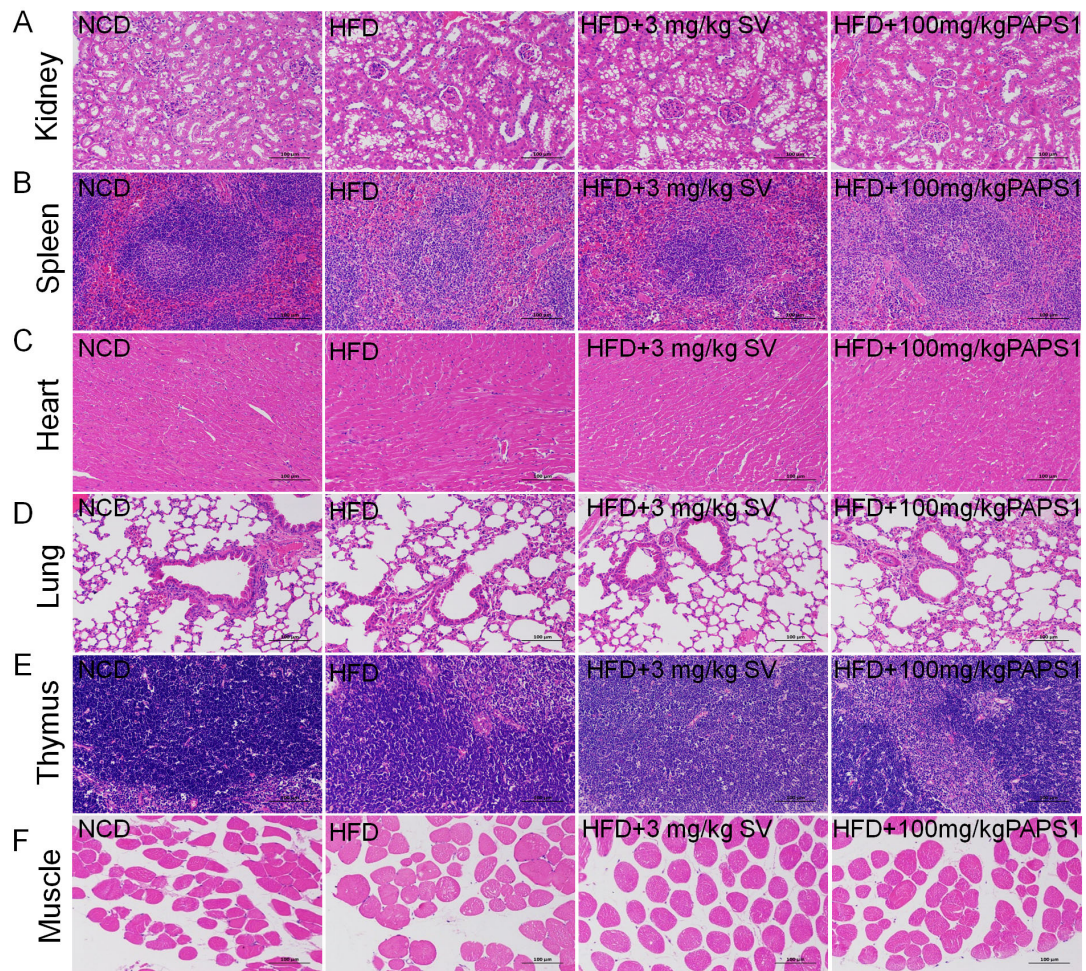

**Figure S1.** Histopathological analysis of the organs (kidney, spleen, heart, lung, thymus, and muscle) of mice using H&E staining (200×; scale bar: 100 μm). NCD: normal chow diet; HFD: high-fat diet; SV: simvastatin; PAPS1: *Pleurotus abieticola* polysaccharide.



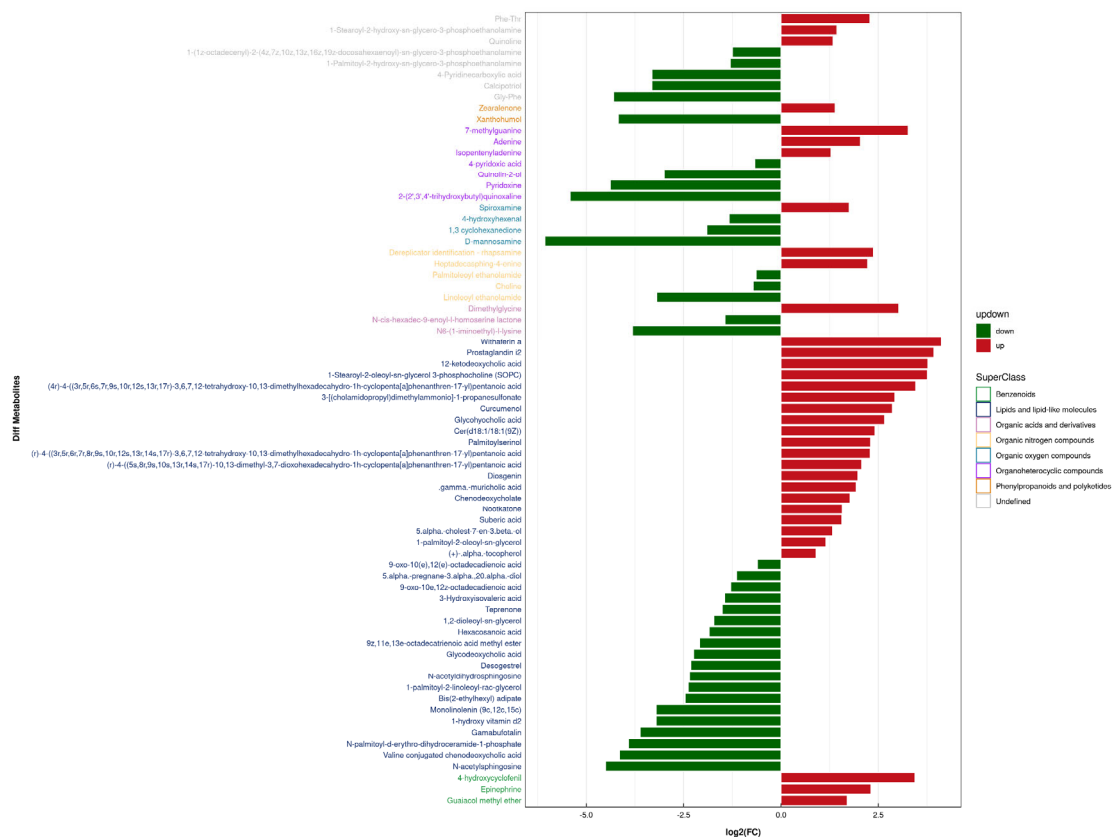

**Figure S3.** Differential fold analysis of the significantly differential fecal metabolites in the positive ion modes between NCD and HFD group.

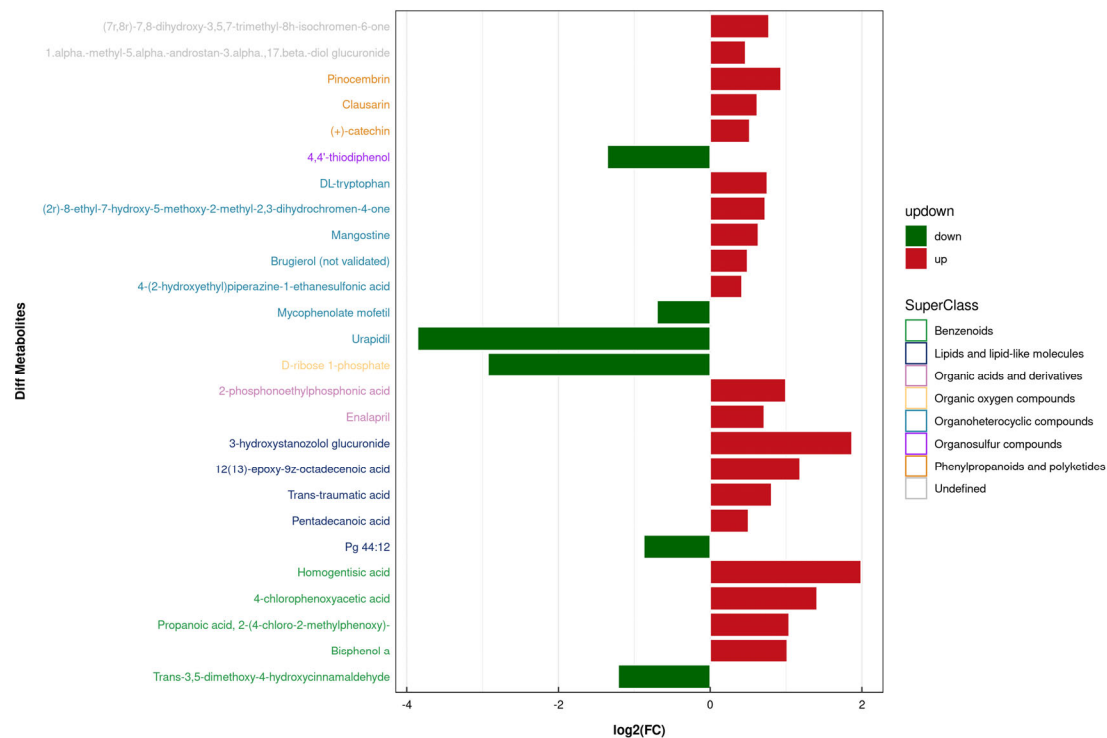

**Figure S4.** Differential fold analysis of significantly different metabolites in the negative ion modes between HFD and PAPS1 group.

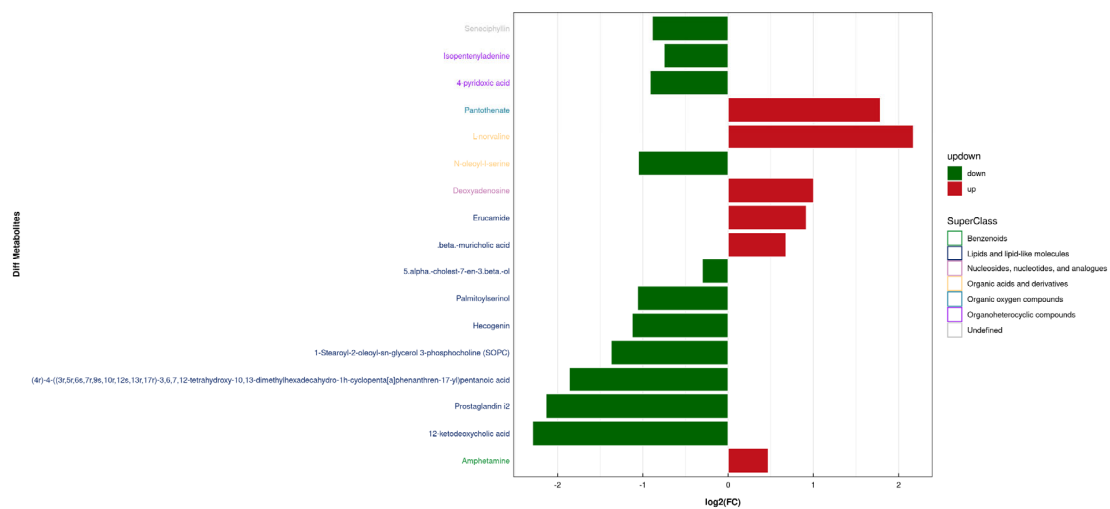

**Figure S5.** Differential fold analysis of significantly different metabolites in the positive ion modes between HFD and PAPS1 group.

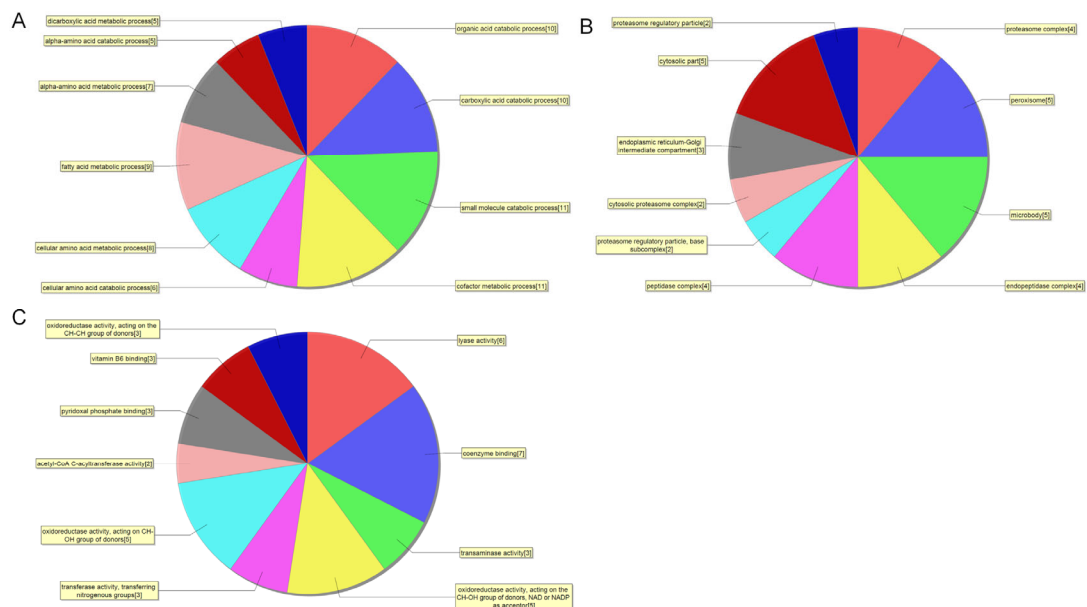

**Figure S6.** Pie chart of biological process (A), cellular component (B), molecular function (C) classification of GO enrichment analysis.



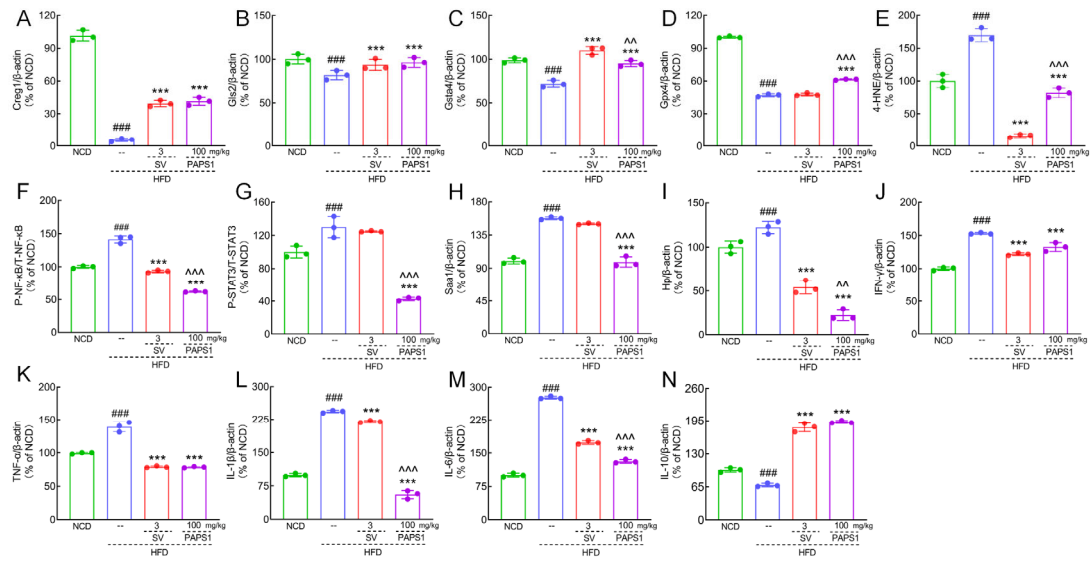

**Figure S7.** Quantification of protein expression in Figure 5D and 6A normalized to that of β-actin and expressed as the percentage of NCD group (n = 3). The data are shown as the mean ± S.E.M. ### $p < 0.001$  versus NCD group; \*\*\* $p < 0.001$  versus HFD group; ^^ $p < 0.01$ , and ^^^ $p < 0.001$  versus SV group. NCD: normal chow diet; HFD: high-fat diet; SV: simvastatin; PAPS1: *Pleurotus abieticola* polysaccharide; Creg1: cellular repressor of E1A-stimulated genes 1; Gls2: glutaminase 2; Gsta4: glutathione S-transferase alpha 4; Gpx4: glutathione peroxidase 4; 4-HNE: 4-hydroxynonenal.; P-NF-κB: phosphorylated NF-κB; P-STAT3: phosphorylated STAT3; Saa1: serum amyloid A protein; Hp: haptoglobin; IFN-γ: interferon-γ; TNF-α: tumor necrosis factor-α; IL-1β: interleukin-1β.

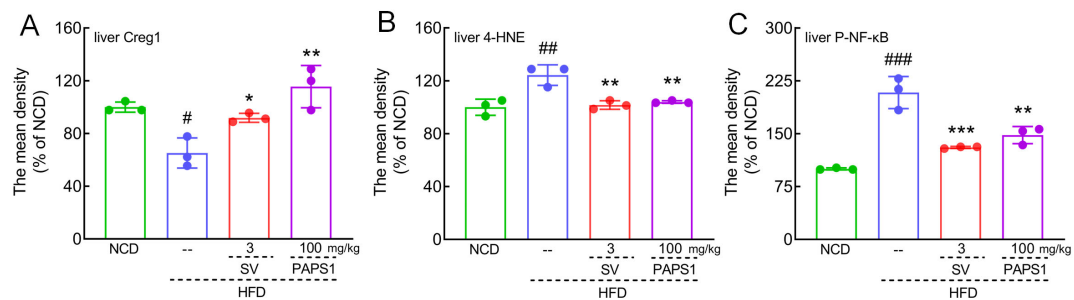

**Figure S8.** Quantification of protein expression in Figure 5E-G and 6I normalized to that of β-actin and expressed as the percentage of NCD mice (n = 3). The data are shown as the mean ± S.E.M. # $p < 0.05$ , ## $p < 0.01$  and ### $p < 0.001$  versus NCD group; \* $p < 0.05$ , \*\* $p < 0.01$  and \*\*\* $p < 0.001$  versus HFD group. NCD: normal chow diet; HFD: high-fat diet; SV: simvastatin; PAPS1: *Pleurotus abieticola* polysaccharide; Creg1: cellular repressor of E1A-stimulated genes 1; 4-HNE: 4-hydroxynonenal; P-NF-κB: phosphorylated NF-κB.

**Table S1.** Details of kits used in biochemical assay and ELISA.

| Kits                                   | Catalog number | Company                                    | Area            |
|----------------------------------------|----------------|--------------------------------------------|-----------------|
| TC detection kit                       | A111-1-1       | Nanjing Jiancheng Bioengineering Institute | Nanjing, China  |
| TC detection kit                       | A110-1-1       | Nanjing Jiancheng Bioengineering Institute | Nanjing, China  |
| LDL-C detection kit                    | A113-1-1       | Nanjing Jiancheng Bioengineering Institute | Nanjing, China  |
| HDL-C detection kit                    | A112-1-1       | Nanjing Jiancheng Bioengineering Institute | Nanjing, China  |
| Mouse ALT ELISA kit                    | MM-44625M1     | Meimian Biotechnology                      | Yancheng, China |
| Mouse AST ELISA kit                    | MM-44115M1     | Meimian Biotechnology                      | Yancheng, China |
| Mouse ROS ELISA kit                    | MM-43700M1     | Meimian Biotechnology                      | Yancheng, China |
| Mouse TNF- $\alpha$ uncoated ELISA kit | 88-7324        | Thermo Fisher Scientific                   | MA, USA         |
| Mouse IL-1 $\beta$ uncoated ELISA kit  | 88-7013        | Thermo Fisher Scientific                   | MA, USA         |
| Mouse IL-6 uncoated ELISA kit          | 88-7064        | Thermo Fisher Scientific                   | MA, USA         |
| Mouse IL-10 uncoated ELISA kit         | 88-7105        | Thermo Fisher Scientific                   | MA, USA         |
| Mouse IL-17A uncoated ELISA kit        | 88-7371        | Thermo Fisher Scientific                   | MA, USA         |
| Mouse IL-22 uncoated ELISA kit         | 88-7422        | Thermo Fisher Scientific                   | MA, USA         |
| Mouse IL-23 uncoated ELISA kit         | 88-7230        | Thermo Fisher Scientific                   | MA, USA         |
| BCA kit                                | 23225          | Thermo Fisher Scientific                   | MA, USA         |

**Table S2.** Details of antibodies used in IHC and WB

| Antibody               | Molecular weight | Catalog number | Dilution for WB | Dilution for IHC | Company     | Area            |
|------------------------|------------------|----------------|-----------------|------------------|-------------|-----------------|
| P-NF- $\kappa$ B       | 65 kDa           | AF2006         | 1:1000          | 1:500            | Affinity    | Jiangsu, China  |
| T-NF- $\kappa$ B       | 65 kDa           | A18210         | 1:2000          | /                | Abclonal    | Wuhan, China    |
| P-STAT3                | 86 kDa           | AF3293         | 1:2000          | /                | Affinity    | Jiangsu, China  |
| T-STAT3                | 92 kDa           | 3096489        | 1:2000          | /                | MILLIPORE   | Shanghai, China |
| IL-1 $\beta$           | 17/35 kDa        | A16288         | 1:2000          | /                | Abclonal    | Wuhan, China    |
| IL-6                   | 23 kDa           | bs-0782R       | 1:2000          | /                | Bioss       | Beijing, China  |
| TNF- $\alpha$          | 17/25 kDa        | A0277          | 1:2000          | /                | Abclonal    | Wuhan, China    |
| IL-10                  | 20/22 kDa        | A2171          | 1:1000          | /                | Abclonal    | Wuhan, China    |
| IFN- $\gamma$          | 19 kDa           | DF6045         | 1:2000          | /                | Affinity    | Jiangsu, China  |
| Creg1                  | 24 kDa           | DF10194        | 1:3000          | 1:500            | Affinity    | Jiangsu, China  |
| Gsta4                  | 27 kDa           | DF12203        | 1:2000          | /                | Affinity    | Jiangsu, China  |
| Gls2                   | 66 kDa           | DF13386        | 1:2000          | /                | Affinity    | Jiangsu, China  |
| Hp                     | 45 kDa           | 381731         | 1:1000          | /                | ZEN BIO     | Chengdu, China  |
| Saa1                   | 13 kDa           | ER62519        | 1:2000          | /                | HuaBio      | Hangzhou, China |
| Gpx4                   | 17 kDa           | A19544         | 1:2000          | /                | Abclonal    | Wuhan, China    |
| 4-HNE                  | 72 kDa           | ab46545        | 1:2000          | 1:500            | Abcam       | Cambridge, UK   |
| $\beta$ -actin         | 43 kDa           | Sc-47778       | 1:2000          | /                | Santa Cruz  | TX, USA         |
| Goat Anti-Rabbit (H+L) | /                | E-AB-1003      | 1:2000          | 1:400            | Elabscience | TX, USA         |
| Goat-Anti-Mouse (H+L)  | /                | E-AB-1001      | 1:2000          | 1:400            | Elabscience | TX, USA         |



**Table S3.** Formula of normal chow diet and high-fat diet.

|                      | NCD  | HFD  |
|----------------------|------|------|
| Fat (kcal%)          | 10%  | 60%  |
| Protein (kcal%)      | 20%  | 20%  |
| Carbohydrate (kcal%) | 70%  | 20%  |
| Total (kcal%)        | 100% | 100% |

NCD: normal chow diet; HFD: high-fat diet; SV: simvastatin; PAPS1: *Pleurotus abieticola* polysaccharide.

**Table S4.** The effect PAPS1 on organ indexes in HLP mice.

|                 | Organ    | NCD         | HFD            |              |                 |
|-----------------|----------|-------------|----------------|--------------|-----------------|
|                 |          |             |                | 3 mg/kg SV   | 100 mg/kg PAPS1 |
| Organ index (%) | Liver    | 3.929±0.139 | 4.586±0.077##  | 4.119±0.143  | 4.105±0.037*    |
|                 | Kidney   | 1.451±0.032 | 1.425±0.017    | 1.475±0.041  | 1.473±0.038     |
|                 | Spleen   | 0.337±0.012 | 0.333±0.024    | 0.362±0.026  | 0.336±0.018     |
|                 | Heart    | 0.703±0.018 | 0.631±0.016#   | 0.699±0.005* | 0.665±0.008     |
|                 | Lung     | 0.606±0.086 | 0.58±0.017     | 0.586±0.014  | 0.572±0.015     |
|                 | Thymus   | 0.070±0.003 | 0.052±0.003    | 0.065±0.004  | 0.073±0.007*    |
|                 | Pancreas | 0.796±0.029 | 0.590±0.017### | 0.704±0.015* | 0.737±0.026**   |

The data were analyzed using a one-way ANOVA and expressed as means ± S.E.M. (n = 6). # $p < 0.05$ , ## $p < 0.01$  and ### $p < 0.001$  versus NCD group, \* $p < 0.05$  and \*\* $p < 0.01$  versus HFD group. NCD: normal chow diet; HFD: high-fat diet; SV: simvastatin; PAPS1: *Pleurotus abieticola* polysaccharide.

**Table S5.** Proteins with significantly differential expression levels in proteomics

| Number                                     | Protein. names           | Unique. peptides | fc. NCD-HFD | fc. HFD-PAPS1 |
|--------------------------------------------|--------------------------|------------------|-------------|---------------|
| Up-regulated proteins by PAPS1 (Number:39) |                          |                  |             |               |
| 1                                          | Surf4                    | 2                | 39.118139   | 0.0465283     |
| 2                                          | Fabp4                    | 4                | 7.4147893   | 0.0712626     |
| 3                                          | Cyp3a11;Cyp3a16;Cyp3a41a | 6                | 75.610755   | 0.1147315     |
| 4                                          | Oxsm                     | 2                | 7.0736367   | 0.1739606     |

|                                              |                                 |    |           |           |
|----------------------------------------------|---------------------------------|----|-----------|-----------|
| 5                                            | Gsta4                           | 2  | 4.4557578 | 0.232885  |
| 6                                            | Scrn2                           | 2  | 5.5890002 | 0.2454149 |
| 7                                            | Bbox1                           | 2  | 3.8376455 | 0.2995994 |
| 8                                            | Acaal1b                         | 5  | 2.0669158 | 0.3618472 |
| 9                                            | Sigmar1                         | 2  | 2.4689319 | 0.3670756 |
| 10                                           | Etf1                            | 3  | 4.6934167 | 0.3737625 |
| 11                                           | Inmt                            | 11 | 4.2251969 | 0.3767676 |
| 12                                           | ORF11;0610007P14Rik             | 2  | 1.8730031 | 0.3849625 |
| 13                                           | Grn                             | 2  | 7.6496016 | 0.3984767 |
| 14                                           | Ca3                             | 16 | 2.3182793 | 0.4141417 |
| 15                                           | Creg1                           | 2  | 5.9268832 | 0.4161873 |
| 16                                           | Cyp2a5;Cyp2a4                   | 5  | 5.5953594 | 0.4324899 |
| 17                                           | Ehhadh                          | 30 | 1.5761045 | 0.4836167 |
| 18                                           | Mtstp8                          | 2  | 2.6396857 | 0.498133  |
| 19                                           | Ddah1                           | 7  | 3.7453863 | 0.5263316 |
| 20                                           | Mpc2                            | 4  | 1.6294373 | 0.5414203 |
| 21                                           | Sec24d                          | 2  | 4.4387162 | 0.5575168 |
| 22                                           | Coq9                            | 3  | 1.7423806 | 0.5597148 |
| 23                                           | Oat                             | 11 | 1.9601638 | 0.5867929 |
| 24                                           | Usp14                           | 2  | 2.480496  | 0.5873441 |
| 25                                           | Acaal1a                         | 4  | 1.8526392 | 0.593132  |
| 26                                           | Khk                             | 11 | 2.9074653 | 0.6037921 |
| 27                                           | Ces1f                           | 15 | 2.658276  | 0.6038403 |
| 28                                           | Me1                             | 13 | 3.0997432 | 0.6125076 |
| 29                                           | Acad8                           | 8  | 1.6742251 | 0.6209792 |
| 30                                           | Bdh1                            | 9  | 1.598835  | 0.6212225 |
| 31                                           | Gck                             | 5  | 1.57656   | 0.6235898 |
| 32                                           | Hibadh                          | 8  | 1.5479204 | 0.6323804 |
| 33                                           | Cisd1                           | 4  | 2.2395791 | 0.6401977 |
| 34                                           | Cyp2c67;Cyp2c68;Cyp2c69;Cyp2c40 | 7  | 2.1551439 | 0.6405674 |
| 35                                           | Gstt1                           | 8  | 1.6869598 | 0.6471396 |
| 36                                           | Hal                             | 14 | 2.5095091 | 0.6494651 |
| 37                                           | Pecr                            | 5  | 1.5320279 | 0.6512129 |
| 38                                           | Gls2                            | 8  | 2.7497557 | 0.6537813 |
| 39                                           | Gpt2                            | 5  | 2.0618183 | 0.6592659 |
| Down-regulated proteins by PAPS1 (Number:25) |                                 |    |           |           |
| 1                                            | Ptms                            | 2  | 0.2024234 | 1.5057212 |
| 2                                            | Knlg1                           | 3  | 0.6039607 | 1.5063507 |
| 3                                            | Mbl1                            | 2  | 0.1350671 | 1.5108965 |
| 4                                            | Hnrnpm                          | 5  | 0.2355895 | 1.5144546 |
| 5                                            | Lrpap1                          | 2  | 0.6098233 | 1.5453759 |

|    |           |    |           |           |
|----|-----------|----|-----------|-----------|
| 6  | Creld2    | 3  | 0.1830977 | 1.5608068 |
| 7  | Rer1      | 2  | 0.3462425 | 1.5711873 |
| 8  | Rpl13a    | 5  | 0.5687837 | 1.5767496 |
| 9  | Slc37a4   | 2  | 0.5201448 | 1.6010325 |
| 10 | Psmb7     | 2  | 0.2572866 | 1.619552  |
| 11 | Psmc2     | 3  | 0.2652712 | 1.6283054 |
| 12 | Rdh11     | 2  | 0.655161  | 1.6459288 |
| 13 | Rps28     | 2  | 0.1257974 | 1.6765039 |
| 14 | Canx      | 15 | 0.5321497 | 1.734502  |
| 15 | Rmdn3     | 3  | 0.1884984 | 1.735627  |
| 16 | Apex1     | 2  | 0.4296374 | 1.7507134 |
| 17 | Rps6      | 5  | 0.317078  | 1.7868004 |
| 18 | Psmc2     | 8  | 0.6314325 | 1.8031546 |
| 19 | D10Jhu81e | 7  | 0.5121806 | 1.8408467 |
| 20 | Ccbl2     | 6  | 0.6094626 | 1.8646155 |
| 21 | Acdb5     | 3  | 0.3950492 | 2.4316103 |
| 22 | Hp        | 11 | 0.546026  | 3.1897325 |
| 23 | Saa1      | 2  | 0.1559159 | 4.0626199 |
| 24 | Tagln2    | 2  | 0.2171844 | 4.3434152 |
| 25 | Rps15     | 2  | 0.3475577 | 4.4990631 |

---

fc. NCD-HFD: the ratio of protein between NCD group and HFD group;

fc. HFD-PAPS1: the ratio of protein between HFD group and PAPS1 group.

NCD: normal chow diet; HFD: high-fat diet; PAPS1: *Pleurotus abieticola* polysaccharide.
